# Supplementary material for: Prospective Study of Nut Consumption and Incidence of Metabolic Syndrome: Tehran Lipid and Glucose Study
Source: PubMed Central journal article supplement (PMC5691673; doi:10.3390/nu9101056), 2017-09-23
Supplement: nutrients-09-01056-s001.pdf [file nutrients-09-01056-s001.pdf]

**Table S1.** Characteristics of participants by tertiles of energy-adjusted walnut consumption at baseline (2006–2008) and after 6.2 years of follow-up (2012–2015): Tehran Lipid and Glucose Study<sup>a</sup>

|                                  | Tertiles of Walnut Consumption |            |            | <i>p</i> <sup>b</sup> |
|----------------------------------|--------------------------------|------------|------------|-----------------------|
|                                  | 1                              | 2          | 3          |                       |
| Participants (n)                 | 422                            | 422        | 421        |                       |
| Age (y)                          | 35.8 ± 0.6                     | 36.7 ± 0.6 | 39.2 ± 0.6 | <0.001                |
| Female (%)                       | 46.7                           | 46.4       | 38.2       | 0.06                  |
| Physical activity (MET h-week)   | 40.2 ± 3.0                     | 37.3 ± 3.0 | 33.9 ± 3.0 | 0.34                  |
| Family history of diabetes (%)   | 18.0                           | 19.0       | 20.9       | 0.76                  |
| Academic degrees (%)             | 35.3                           | 34.4       | 34.2       | 0.98                  |
| Occupational status, worker (%)  | 32.5                           | 33.7       | 35.9       | 0.23                  |
| Current smoking (%)              | 12.5                           | 11.2       | 8.4        | 0.17                  |
| BMI (kg/m <sup>2</sup> )         | 23.4 ± 0.2                     | 24.4 ± 0.2 | 22.4 ± 0.2 | 0.91                  |
| Overweight and obese (%)         | 56.8                           | 60.0       | 60.9       | 0.44                  |
| Anti-hypertensive drug (%)       | 68.4                           | 78.9       | 81.0       | 0.61                  |
| Anti-hyperglycemia drug (%)      | 83.3                           | 80.0       | 85.7       | 0.95                  |
| Hypolipidemic drugs (%)          | 68.4                           | 76.1       | 76.5       | 0.64                  |
| Systolic blood pressure (mm Hg)  |                                |            |            |                       |
| At baseline                      | 107 ± 0.6                      | 108 ± 0.6  | 108 ± 0.6  | 0.53                  |
| After 6.2 years                  | 114 ± 0.7                      | 112 ± 0.7  | 110 ± 0.7  | 0.03                  |
| Diastolic Blood pressure (mm Hg) |                                |            |            |                       |
| At baseline                      | 71.8 ± 0.4                     | 71.6 ± 0.4 | 72.0 ± 0.4 | 0.82                  |
| After 6.2 years                  | 76.8 ± 0.5                     | 75.8 ± 0.5 | 75.9 ± 0.5 | 0.24                  |
| Fasting serum glucose (mg/dl)    |                                |            |            |                       |
| At baseline                      | 88.9 ± 0.6                     | 86.2 ± 0.6 | 84.2 ± 0.6 | 0.04                  |
| After 6.2 years                  | 94.8 ± 0.9                     | 94.5 ± 0.9 | 94.8 ± 0.9 | 0.96                  |
| Serum triglyceride (mg/dl)       |                                |            |            |                       |
| At baseline                      | 124 ± 3.4                      | 127 ± 3.4  | 124 ± 3.4  | 0.85                  |
| After 6.2 years                  | 137 ± 3.5                      | 140 ± 3.6  | 127 ± 2.9  | 0.02                  |
| Serum HDL-C (mg/dl)              |                                |            |            |                       |
| At baseline                      | 43.3 ± 0.5                     | 43.5 ± 0.5 | 44.9 ± 0.5 | 0.007                 |
| After 6.2 years                  | 50.3 ± 0.6                     | 49.3 ± 0.6 | 51.1 ± 0.6 | 0.12                  |
| Waist circumference (cm)         |                                |            |            |                       |
| At baseline                      | 86.6 ± 0.6                     | 87.4 ± 0.6 | 86.8 ± 0.6 | 0.73                  |
| After 6.2 years                  | 93.9 ± 0.6                     | 92.5 ± 0.6 | 91.4 ± 0.6 | 0.02                  |

BMI, Body Mass Index;

Obese, BMI  $\geq 25$  kg/m<sup>2</sup>

<sup>a</sup>Mean  $\pm$  SE for all these values, except for variables was determined

<sup>b</sup>P values determined using ANOVA for continuous variables and chi-square test for categorical variables.

**Table S2.** Characteristics of participants by tertiles of energy-adjusted almond consumption at baseline (2006–2008) and after 6.2 years of follow-up (2012–2015): Tehran Lipid and Glucose Study<sup>a</sup>

|                                  | Tertiles of Almond Consumption |            |            | <i>P</i> <sup>b</sup> |
|----------------------------------|--------------------------------|------------|------------|-----------------------|
|                                  | 1                              | 2          | 3          |                       |
| Participants (n)                 | 473                            | 316        | 476        |                       |
| Age (y)                          | 34.2 ± 0.5                     | 36.1 ± 0.6 | 38.1 ± 0.6 | <0.001                |
| Female (%)                       | 42.5                           | 44.0       | 45.0       | 0.51                  |
| Physical activity (MET h-week)   | 35.3 ± 2.8                     | 38.2 ± 3.5 | 38.3 ± 2.8 | 0.70                  |
| Family history of diabetes (%)   | 20.7                           | 17.4       | 19.1       | 0.43                  |
| Academic degrees (%)             | 31.3                           | 37.7       | 36.0       | 0.21                  |
| Occupational status, worker (%)  | 35.6                           | 37.2       | 34.6       | 0.83                  |
| Current smoking (%)              | 9.5                            | 12.8       | 10.4       | 0.37                  |
| BMI (kg/m <sup>2</sup> )         | 23.5 ± 0.2                     | 23.5 ± 0.2 | 24.9 ± 0.2 | 0.64                  |
| Overweight and obese (%)         | 59.9                           | 58.8       | 58.8       | 0.92                  |
| Anti-hypertensive drug (%)       | 78.6                           | 71.4       | 76.5       | 0.87                  |
| Anti-hyperglycemia drug (%)      | 77.8                           | 77.8       | 79.5       | 0.93                  |
| Hypolipidemic drugs (%)          | 68.0                           | 84.2       | 72.3       | 0.21                  |
| Systolic blood pressure (mm Hg)  |                                |            |            |                       |
| At baseline                      | 108 ± 0.6                      | 108 ± 0.7  | 107 ± 0.6  | 0.81                  |
| After 6.2 years                  | 112 ± 0.7                      | 112 ± 0.9  | 112 ± 0.7  | 0.92                  |
| Diastolic Blood pressure (mm Hg) |                                |            |            |                       |
| At baseline                      | 71.8 ± 0.4                     | 71.8 ± 0.4 | 71.7 ± 0.4 | 0.98                  |
| After 6.2 years                  | 76.2 ± 0.4                     | 76.4 ± 0.5 | 76.1 ± 0.4 | 0.85                  |
| Fasting serum glucose (mg/dl)    |                                |            |            |                       |
| At baseline                      | 87.1 ± 0.6                     | 87.0 ± 0.7 | 85.4 ± 0.6 | 0.10                  |
| After 6.2 years                  | 95.9 ± 0.8                     | 95.6 ± 0.8 | 92.9 ± 0.8 | 0.02                  |
| Serum triglyceride (mg/dl)       |                                |            |            |                       |
| At baseline                      | 127 ± 3.2                      | 127 ± 3.9  | 121 ± 3.2  | 0.35                  |
| After 6.2 years                  | 137 ± 3.3                      | 136 ± 4.0  | 132 ± 3.3  | 0.50                  |
| Serum HDL-C (mg/dl)              |                                |            |            |                       |
| At baseline                      | 43.6 ± 0.5                     | 43.2 ± 0.6 | 44.7 ± 0.5 | 0.10                  |
| After 6.2 years                  | 50.3 ± 0.6                     | 49.6 ± 0.6 | 50.4 ± 0.6 | 0.26                  |
| Waist circumference (cm)         |                                |            |            |                       |
| At baseline                      | 87.0 ± 0.6                     | 87.1 ± 0.7 | 86.7 ± 0.6 | 0.86                  |
| After 6.2 years                  | 93.4 ± 0.5                     | 91.9 ± 0.5 | 90.5 ± 0.5 | 0.61                  |

BMI, Body Mass Index;

Obese, BMI  $\geq 25$  kg/m<sup>2</sup>

<sup>a</sup>Mean  $\pm$  SE for all these values, except for variables was determined

<sup>b</sup>P values determined using ANOVA for continuous variables and chi-square test for categorical variables.

**Table S3.** Characteristics of participants by tertiles of energy-adjusted peanut consumption at baseline (2006–2008) and after 6.2 years of follow-up (2012–2015): Tehran Lipid and Glucose Study<sup>a</sup>

|                                  | Tertiles of Peanut Consumption |            |            | <i>p</i> <sup>b</sup> |
|----------------------------------|--------------------------------|------------|------------|-----------------------|
|                                  | 1                              | 2          | 3          |                       |
| Participants (n)                 | 422                            | 337        | 506        |                       |
| Age (y)                          | 36.2 ± 0.5                     | 36.9 ± 0.5 | 38.8 ± 0.6 | <0.001                |
| Female (%)                       | 42.3                           | 44.2       | 49.8       | 0.08                  |
| Physical activity (MET h-week)   | 40.5 ± 3.0                     | 36.2 ± 3.3 | 35.2 ± 2.7 | 0.39                  |
| Family history of diabetes (%)   | 19.2                           | 20.5       | 18.6       | 0.34                  |
| Academic degrees (%)             | 28.7                           | 31.5       | 33.0       | 0.48                  |
| Occupational status, worker (%)  | 34.2                           | 38.2       | 37.5       | 0.49                  |
| Current smoking (%)              | 8.6                            | 10.8       | 12.4       | 0.21                  |
| BMI (kg/m <sup>2</sup> )         | 22.4 ± 0.2                     | 24.8 ± 0.2 | 22.4 ± 0.2 | 0.82                  |
| Overweight and obese (%)         | 61.4                           | 57.3       | 58.7       | 0.48                  |
| Anti-hypertensive drug (%)       | 85.7                           | 88.9       | 59.1       | 0.06                  |
| Anti-hyperglycemia drug (%)      | 83.3                           | 66.7       | 79.5       | 0.41                  |
| Hypolipidemic drugs (%)          | 75.6                           | 70.8       | 76.1       | 0.81                  |
| Systolic blood pressure (mm Hg)  |                                |            |            |                       |
| At baseline                      | 109 ± 0.6                      | 106 ± 0.7  | 108 ± 0.6  | 0.08                  |
| After 6.2 years                  | 112 ± 0.7                      | 111 ± 0.7  | 112 ± 0.7  | 0.48                  |
| Diastolic Blood pressure (mm Hg) |                                |            |            |                       |
| At baseline                      | 72.5 ± 0.4                     | 71.0 ± 0.4 | 71.8 ± 0.4 | 0.10                  |
| After 6.2 years                  | 76.0 ± 0.5                     | 76.2 ± 0.5 | 76.3 ± 0.4 | 0.85                  |
| Fasting serum glucose (mg/dl)    |                                |            |            |                       |
| At baseline                      | 86.4 ± 0.6                     | 85.1 ± 0.6 | 87.3 ± 0.6 | 0.04                  |
| After 6.2 years                  | 95.1 ± 0.9                     | 93.2 ± 0.8 | 95.4 ± 0.9 | 0.19                  |
| Serum triglyceride (mg/dl)       |                                |            |            |                       |
| At baseline                      | 123 ± 3.4                      | 130 ± 3.8  | 123 ± 3.1  | 0.34                  |
| After 6.2 years                  | 133 ± 3.5                      | 141 ± 3.9  | 132 ± 3.2  | 0.13                  |
| Serum HDL-C (mg/dl)              |                                |            |            |                       |
| At baseline                      | 43.8 ± 0.5                     | 43.4 ± 0.5 | 44.3 ± 0.5 | 0.44                  |
| After 6.2 years                  | 50.7 ± 0.6                     | 49.7 ± 0.6 | 51.1 ± 0.6 | 0.51                  |
| Waist circumference (cm)         |                                |            |            |                       |
| At baseline                      | 87.0 ± 0.6                     | 86.4 ± 0.6 | 87.2 ± 0.6 | 0.67                  |
| After 6.2 years                  | 92.5 ± 0.5                     | 92.3 ± 0.5 | 92.1 ± 0.5 | 0.87                  |

BMI, Body Mass Index;

Obese, BMI  $\geq 25$  kg/m<sup>2</sup>

<sup>a</sup>Mean  $\pm$  SE for all these values, except for variables was determined

<sup>b</sup>P values determined using ANOVA for continuous variables and chi-square test for categorical variables.

**Table S4.** Characteristics of participants by tertiles of energy-adjusted hazelnut consumption at baseline (2006–2008) and after 6.2 years of follow-up (2012–2015): Tehran Lipid and Glucose Study<sup>a</sup>

|                                  | Tertiles of Hazelnut Consumption |            |            | <i>p</i> <sup>b</sup> |
|----------------------------------|----------------------------------|------------|------------|-----------------------|
|                                  | 1                                | 2          | 3          |                       |
| Participants (n)                 | 454                              | 391        | 420        |                       |
| Age (y)                          | 35.9 ± 0.6                       | 37.1 ± 0.6 | 38.6 ± 0.5 | <0.001                |
| Female (%)                       | 56.8                             | 57.5       | 53.8       | 0.48                  |
| Physical activity (MET h-week)   | 36.2 ± 2.9                       | 36.6 ± 3.1 | 38.7 ± 3.0 | 0.81                  |
| Family history of diabetes (%)   | 19.2                             | 19.4       | 19.3       | 0.56                  |
| Academic degrees (%)             | 36.5                             | 37.9       | 36.8       | 0.32                  |
| Occupational status, worker (%)  | 32.5                             | 35.5       | 32.0       | 0.24                  |
| Current smoking (%)              | 9.7                              | 13.9       | 8.6        | 0.04                  |
| BMI (kg/m <sup>2</sup> )         | 26.7 ± 0.2                       | 26.1 ± 0.2 | 26.2 ± 0.2 | 0.07                  |
| Overweight and obese (%)         | 62.1                             | 53.9       | 61.1       | 0.31                  |
| Anti-hypertensive drug (%)       | 82.8                             | 78.6       | 62.5       | 0.30                  |
| Anti-hyperglycemia drug (%)      | 95.3                             | 75.0       | 72.7       | 0.20                  |
| Hypolipidemic drugs (%)          | 66.0                             | 76.7       | 80.0       | 0.64                  |
| Systolic blood pressure (mm Hg)  |                                  |            |            |                       |
| At baseline                      | 108 ± 0.6                        | 107 ± 0.7  | 108 ± 0.6  | 0.33                  |
| After 6.2 years                  | 112 ± 0.7                        | 112 ± 0.7  | 111 ± 0.7  | 0.37                  |
| Diastolic Blood pressure (mm Hg) |                                  |            |            |                       |
| At baseline                      | 72.2 ± 0.4                       | 71.4 ± 0.4 | 71.7 ± 0.4 | 0.44                  |
| After 6.2 years                  | 76.5 ± 0.5                       | 75.4 ± 0.5 | 76.5 ± 0.4 | 0.18                  |
| Fasting serum glucose (mg/dl)    |                                  |            |            |                       |
| At baseline                      | 86.5 ± 0.6                       | 86.1 ± 0.6 | 86.7 ± 0.6 | 0.76                  |
| After 6.2 years                  | 95.9 ± 0.8                       | 94.2 ± 0.9 | 93.9 ± 0.9 | 0.22                  |
| Serum triglyceride (mg/dl)       |                                  |            |            |                       |
| At baseline                      | 127 ± 3.2                        | 124 ± 3.5  | 124 ± 3.4  | 0.79                  |
| After 6.2 years                  | 136 ± 3.4                        | 135 ± 3.6  | 133 ± 3.5  | 0.76                  |
| Serum HDL-C (mg/dl)              |                                  |            |            |                       |
| At baseline                      | 43.0 ± 0.5                       | 44.7 ± 0.5 | 44.2 ± 0.5 | 0.44                  |
| After 6.2 years                  | 49.9 ± 0.6                       | 51.1 ± 0.6 | 49.6 ± 0.6 | 0.20                  |
| Waist circumference (cm)         |                                  |            |            |                       |
| At baseline                      | 88.0 ± 0.6                       | 85.7 ± 0.6 | 86.9 ± 0.6 | 0.05                  |
| After 6.2 years                  | 93.2 ± 0.5                       | 91.1 ± 0.5 | 92.4 ± 0.5 | 0.04                  |

BMI, Body Mass Index;

Obese, BMI  $\geq 25$  kg/m<sup>2</sup>

<sup>a</sup>Mean  $\pm$  SE for all these values, except for variables was determined

<sup>b</sup>P values determined using ANOVA for continuous variables and chi-square test for categorical variables.



**Table S5.** Characteristics of participants by tertiles of energy-adjusted pistachio consumption at baseline (2006–2008) and after 6.2 years of follow-up (2012–2015): Tehran Lipid and Glucose Study<sup>a</sup>

|                                  | Tertiles of Pistachio Consumption |            |            | <i>P</i> <sup>b</sup> |
|----------------------------------|-----------------------------------|------------|------------|-----------------------|
|                                  | 1                                 | 2          | 3          |                       |
| Participants (n)                 | 422                               | 395        | 448        |                       |
| Age (y)                          | 38.1 ± 0.5                        | 36.7 ± 0.6 | 36.9 ± 0.5 | 0.24                  |
| Female (%)                       | 59.5                              | 55.4       | 53.3       | 0.29                  |
| Physical activity (MET h-week)   | 38.5 ± 3.0                        | 40.5 ± 3.1 | 32.8 ± 2.9 | 0.17                  |
| Family history of diabetes (%)   | 18.5                              | 20.5       | 19.0       | 0.83                  |
| Academic degrees (%)             | 30.7                              | 35.8       | 37.4       | 0.07                  |
| Occupational status, worker (%)  | 33.0                              | 32.5       | 35.1       | 0.52                  |
| Current smoking (%)              | 11.7                              | 12.9       | 7.6        | 0.04                  |
| BMI (kg/m <sup>2</sup> )         | 27.0 ± 0.2                        | 26.0 ± 0.2 | 26.4 ± 0.2 | 0.26                  |
| Overweight and obese (%)         | 41.8                              | 42.8       | 38.0       | 0.33                  |
| Anti-hypertensive drug (%)       | 80.0                              | 75.0       | 73.7       | 0.88                  |
| Anti-hyperglycemia drug (%)      | 96.5                              | 88.9       | 76.9       | 0.54                  |
| Hypolipidemic drugs (%)          | 10.5                              | 10.9       | 12.3       | 0.92                  |
| Systolic blood pressure (mm Hg)  |                                   |            |            |                       |
| At baseline                      | 108 ± 0.6                         | 107 ± 0.7  | 108 ± 0.6  | 0.52                  |
| After 6.2 years                  | 112 ± 0.7                         | 112 ± 0.7  | 111 ± 0.7  | 0.53                  |
| Diastolic Blood pressure (mm Hg) |                                   |            |            |                       |
| At baseline                      | 71.6 ± 0.4                        | 71.6 ± 0.4 | 72.0 ± 0.4 | 0.80                  |
| After 6.2 years                  | 76.2 ± 0.5                        | 76.2 ± 0.5 | 76.1 ± 0.4 | 0.98                  |
| Fasting serum glucose (mg/dl)    |                                   |            |            |                       |
| At baseline                      | 86.7 ± 0.6                        | 85.4 ± 0.6 | 87.1 ± 0.6 | 0.13                  |
| After 6.2 years                  | 95.7 ± 0.9                        | 93.3 ± 0.9 | 95.1 ± 0.9 | 0.16                  |
| Serum triglyceride (mg/dl)       |                                   |            |            |                       |
| At baseline                      | 127 ± 3.4                         | 127 ± 3.5  | 121 ± 3.3  | 0.41                  |
| After 6.2 years                  | 133 ± 3.5                         | 138 ± 3.6  | 133 ± 3.4  | 0.57                  |
| Serum HDL-C (mg/dl)              |                                   |            |            |                       |
| At baseline                      | 43.4 ± 0.5                        | 43.2 ± 0.5 | 45.0 ± 0.5 | 0.02                  |
| After 6.2 years                  | 50.9 ± 0.6                        | 49.6 ± 0.6 | 50.0 ± 0.6 | 0.27                  |
| Waist circumference (cm)         |                                   |            |            |                       |
| At baseline                      | 87.1 ± 0.6                        | 86.0 ± 0.6 | 87.5 ± 0.6 | 0.27                  |
| After 6.2 years                  | 92.6 ± 0.5                        | 91.6 ± 0.5 | 92.6 ± 0.5 | 0.34                  |

BMI, Body Mass Index;

Obese, BMI  $\geq 25$  kg/m<sup>2</sup>

<sup>a</sup>Mean  $\pm$  SE for all these values, except for variables was determined

<sup>b</sup>P values determined using ANOVA for continuous variables and chi-square test for categorical variables.
